# Supplementary material for: Prevalence of Malnutrition, Its Associated Factors, and Challenges Faced Among Pediatric Oncology Patients at Mulago National Referral Hospital: Mixed Study Design
Source: Research Square preprint supplement (doi:10.21203/rs.3.rs-7769121/v1), 2025-12-03
Supplement: Supplementary file 1 [file 16d02155be22e4be40ab513d.docx]

**Supplementary 1: In-Depth Interview Guide for Caregivers**

**Title of the study:** Prevalence of malnutrition, its associated factors, and challenges faced among pediatric oncology patients receiving chemotherapy at Mulago national referral hospital

**Introduction to participant**

Thank you for participating in this interview. We are exploring the factors and challenges associated with maintaining adequate nutrition for children with cancer undergoing chemotherapy. Your insights will contribute significantly to understanding these issues.

1. **Background information**:
2. Could you tell me about your relationship with the child undergoing cancer treatment?
3. Could you describe the child’s typical nutritional habits before and during cancer treatment?
4. **Challenges in maintaining adequate nutrition**

i. Tell me the challenges that you face in maintaining adequate nutrition for your child having cancer and receiving cancer treatment.

**4. Suggestions for improvement**

1. In your opinion, what could be done to better support children undergoing treatment in maintaining adequate nutrition?
2. **Closing remarks**

Thank you for sharing your experiences. Your insights are invaluable and will contribute to developing better support for children with cancer to maintain adequate nutrition during treatment.

**Supplementary 2: Key Informant Interview Guide for Health Care Workers**

**Title of the study:** Prevalence of malnutrition, its associated factors, and challenges faced among pediatric oncology patients receiving chemotherapy at Mulago national referral hospital

**1. Introduction to Participant**

Thank you for agreeing to participate in this interview. We are exploring the challenges faced by children diagnosed with cancer and receiving chemotherapy in maintaining adequate nutrition. As a healthcare worker, your insights and experiences are vital in helping us understand these issues and identifying potential solutions. The interview will take approximately 30 minutes to 1 hour. Your responses will remain confidential.

**2. Background information.**

i. What is your role and responsibilities in providing care to children undergoing chemotherapy?

**3. Challenges in faced by children diagnosed with cancer on chemotherapy maintaining Adequate Nutrition.**

i. From your perspective, what are the main challenges faced in ensuring adequate nutrition for children undergoing chemotherapy?

1. **Suggestions for improvement**
   i. What recommend would you make to improve the nutritional status of children undergoing chemotherapy?
2. **Closing remarks**
   Thank you very much for taking the time to share your experiences and insights. Your input will be instrumental in making appropriate recommendations aimed at improving the nutritional status of children diagnosed with cancer and on chemotherapy?
